# Supplementary material for: Drastic and subtle thermally and gas-induced transformations of pure 4-tert-butylcalix[4]arene
Source: Royal Society of Chemistry journal article supplement (doi:10.1039/c4ce01156b), 2014-07-15
Supplement: c4ce01156b1.pdf [file c4ce01156b1.pdf]

# **Drastic and Subtle Thermally and Gas-Induced Transformations of Pure 4-*tert*-Butylcalix[4]arene**

Oleg V. Surov, Vladimir P. Barannikov and Marina I. Voronova

## **Supporting Information**

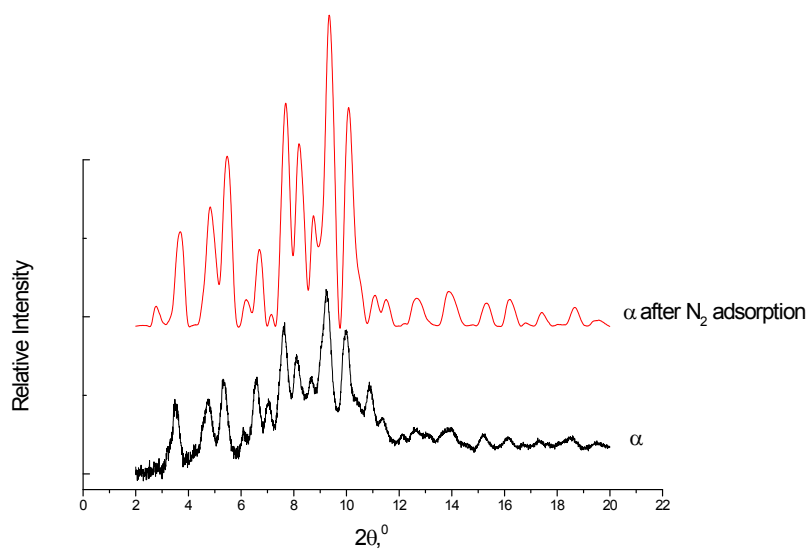

Fig. S1. X-Ray powder diffraction patterns for *t*BC  $\alpha$ -form.

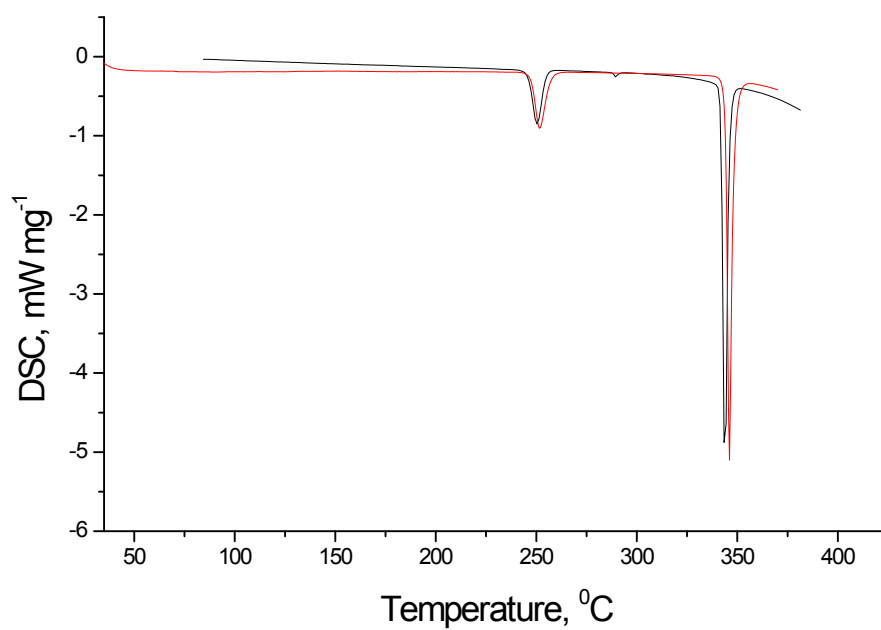

Fig. S2. DSC traces for *t*BC samples:  $\alpha$ -form (black) and  $\alpha$ -form after low-temperature  $N_2$  adsorption (red).

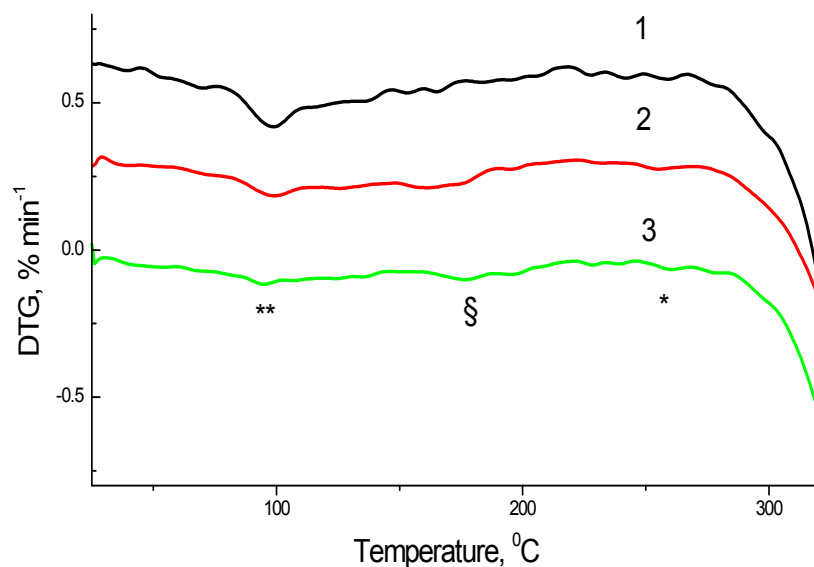

Fig. S3. DTG traces for *t*BC samples after air storage: (1)  $\beta_0$  form; (2)  $\alpha$  form treated by vacuum heating at 260°C for 30 minutes; (3)  $\beta_0$  form after the low-temperature N<sub>2</sub> adsorption. Signs \*, \*\* and § correspond to marks for phase transitions in Fig.3.

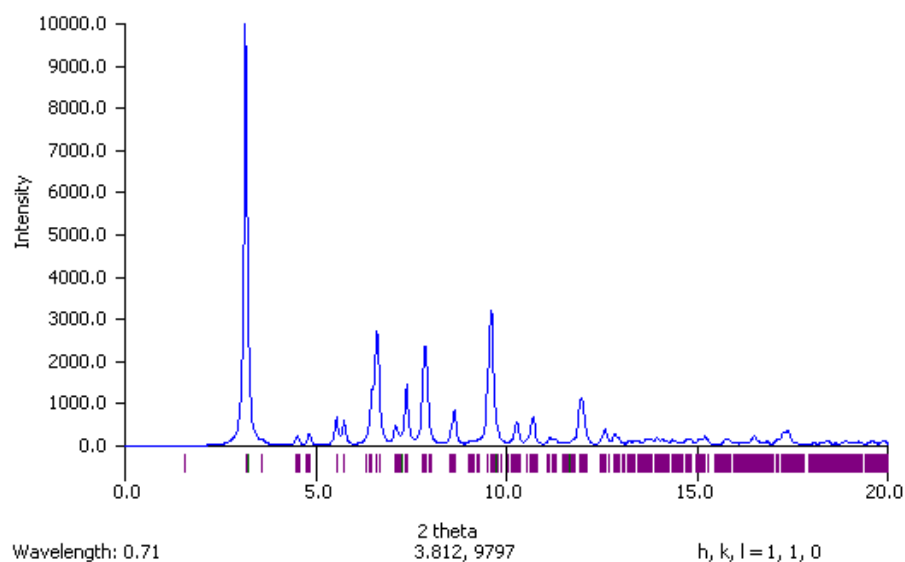

Fig. S4. Simulated diffraction pattern of single crystals of  $\beta_0$  form of *t*BC partially loaded by xenon (Xe/*t*BC ratio up to 0.25).<sup>34</sup>

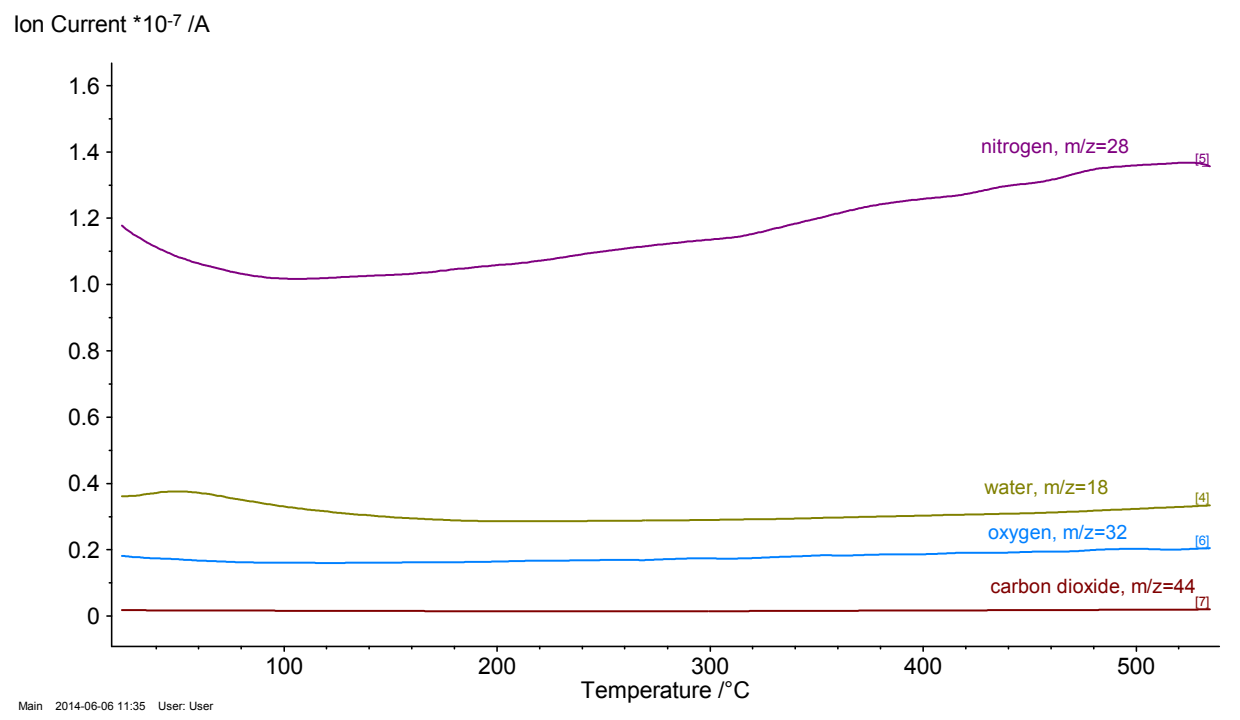

Fig. S5. Background ion currents for N<sub>2</sub>, O<sub>2</sub>, H<sub>2</sub>O and CO<sub>2</sub>.

Table S1. BET specific surface area of *t*BC  $\alpha$  form.

Quantachrome NovaWin - Data Acquisition and Reduction  
for NOVA instruments  
©1994-2010, Quantachrome Instruments  
version 11.0

Analysis Report  
Operator: MISI Date: 2013/06/26 Operator: 111 Date: 4/23/2014  
Sample ID: 1 Filename: D:\Мои  
документы\2013\Quantachrome\адсорбция\Kalixaren\_4tert\_Butyl.qps  
Sample Desc: Comment:  
Sample weight: 0.1083 g Sample Volume: 0.1092 cc  
Outgas Time: 14.0 hrs Outgas Temp: 120.0 C  
Analysis gas: Nitrogen Bath Temp: 77.3 K  
Press. Tolerance: 0.100/0.100 (ads/des) Equil time: 60/60 sec (ads/des) Equil timeout: 240/240 sec (ads/des)  
Analysis Time: 85.1 min End of run: 2013/06/26 10:34:49 Instrument: Nova Station A  
Cell ID: 1 F/W version: 0.00  
Adsorbate Nitrogen Temperature 77.350K  
Molec. Wt.: 28.013 g Cross Section: 16.200 EI Liquid Density: 0.808 g/cc

| Relative Pressure<br>P/Po | Volume @ STP<br>cc/g | 1 / [ W((Po/P) - 1) ] |
|---------------------------|----------------------|-----------------------|
| 7.32790e-02               | 0.7409               | 8.5390e+01            |
| 1.45115e-01               | 1.2417               | 1.0938e+02            |
| 2.16148e-01               | 1.7854               | 1.2357e+02            |
| 2.87962e-01               | 2.3995               | 1.3485e+02            |
| 3.58916e-01               | 3.1035               | 1.4434e+02            |
| 4.28030e-01               | 3.8566               | 1.5525e+02            |
| 4.16593e-01               | 6.4722               | 8.8275e+01            |
| 3.45624e-01               | 5.4887               | 7.6994e+01            |
| 2.71846e-01               | 4.4235               | 6.7528e+01            |
| 2.03701e-01               | 3.4323               | 5.9633e+01            |
| 1.34493e-01               | 2.3921               | 5.1976e+01            |
| 6.20370e-02               | 1.1891               | 4.4505e+01            |

BET summary  
Slope = 167.327  
Intercept = 5.409e+01  
Correlation coefficient, r = 0.563521  
C constant = 4.093  
Surface Area = 15.728 ml/g

Table S2. BET specific surface area of *t*BC  $\beta_0$  form (1).

Quantachrome NovaWin - Data Acquisition and Reduction  
for NOVA instruments  
©1994-2010, Quantachrome Instruments  
version 11.0

Analysis Report  
Operator: MISI Date: 2013/06/22 Operator: 111 Date: 4/23/2014  
Sample ID: 1 Filename: D:\Мои  
документы\2013\Quantachrome\адсобция\Kalixaren\_tBcb0.qps  
Sample Desc: Comment:  
Sample weight: 0.1081 g Sample Volume: 0.10326 cc  
Outgas Time: 14.0 hrs OutgasTemp: 120.0 C  
Analysis gas: Nitrogen Bath Temp: 77.3 K  
Press. Tolerance: 0.100/0.100 (ads/des) Equil time: 60/60 sec (ads/des) Equil timeout: 240/240 sec (ads/des)  
Analysis Time: 32.9 min End of run: 2013/06/22 10:54:10 Instrument: Nova Station A  
Cell ID: 1 F/W version: 0.00  
Adsorbate Nitrogen Temperature 77.350K  
Molec. Wt.: 28.013 g Cross Section: 16.200 EI Liquid Density: 0.808 g/cc

| Relative Pressure<br>P/Po | Volume @ STP<br>cc/g | 1 / [ W((Po/P) - 1) ] |
|---------------------------|----------------------|-----------------------|
| 1.12613e-01               | 0.6860               | 1.4801e+02            |
| 2.23228e-01               | 1.2287               | 1.8713e+02            |
| 3.34947e-01               | 1.9601               | 2.0559e+02            |
| 4.43202e-01               | 2.8235               | 2.2556e+02            |

BET summary  
Slope = 227.651  
Intercept = 1.282e+02  
Correlation coefficient, r = 0.982471  
C constant = 2.776  
  
Surface Area = 9.787 ml/g

Table S3. BET specific surface area of *t*BC  $\beta_0$  form (2).

Quantachrome NovaWin - Data Acquisition and Reduction  
for NOVA instruments  
©1994-2010, Quantachrome Instruments  
version 11.0

Analysis Report  
Operator: MISI Date: 2013/06/25 Operator: 111 Date: 4/23/2014  
Sample ID: 1 Filename: D:\Мои  
документы\2013\Quantachrome\адсобция\Kalixaren\_tVcb02.qps  
Sample Desc: Comment:  
Sample weight: 0.1095 g Sample Volume: 0.10086 cc  
Outgas Time: 14.0 hrs OutgasTemp: 120.0 C  
Analysis gas: Nitrogen Bath Temp: 77.3 K  
Press. Tolerance: 0.100/0.100 (ads/des) Equil time: 60/60 sec (ads/des) Equil timeout: 240/240 sec (ads/des)  
Analysis Time: 79.7 min End of run: 2013/06/25 10:51:05 Instrument: Nova Station A  
Cell ID: 1 F/W version: 0.00  
Adsorbate Nitrogen Temperature 77.350K  
Molec. Wt.: 28.013 g Cross Section: 16.200 EI Liquid Density: 0.808 g/cc

| Relative Pressure<br>P/Po | Volume @ STP<br>cc/g | 1 / [ W((Po/P) - 1) ] |
|---------------------------|----------------------|-----------------------|
| 7.42340e-02               | 0.3783               | 1.6960e+02            |
| 1.46246e-01               | 0.5824               | 2.3532e+02            |
| 2.17571e-01               | 0.8306               | 2.6785e+02            |
| 2.88433e-01               | 1.1677               | 2.7776e+02            |
| 3.59121e-01               | 1.5786               | 2.8401e+02            |
| 4.28225e-01               | 2.0462               | 2.9285e+02            |
| 4.14905e-01               | 4.0859               | 1.3886e+02            |
| 3.43753e-01               | 3.4352               | 1.2201e+02            |
| 2.72522e-01               | 2.7598               | 1.0861e+02            |
| 2.05162e-01               | 2.1003               | 9.8331e+01            |
| 1.33722e-01               | 1.3647               | 9.0500e+01            |
| 6.11880e-02               | 0.5203               | 1.0022e+02            |

BET summary

Slope = 250.341  
Intercept = 1.207e+02  
Correlation coefficient, r = 0.382359  
C constant = 3.074

Surface Area = 9.385 ml/g
